# Supplementary material for: Phlebotomine sand fly survey in the focus of leishmaniasis in Madrid, Spain (2012–2014): seasonal dynamics, Leishmania infantum infection rates and blood meal preferences
Source: Springer Nature journal article supplement (doi:10.1186/s13071-017-2309-z), 2017-08-01

Alignment of isolates from 2012

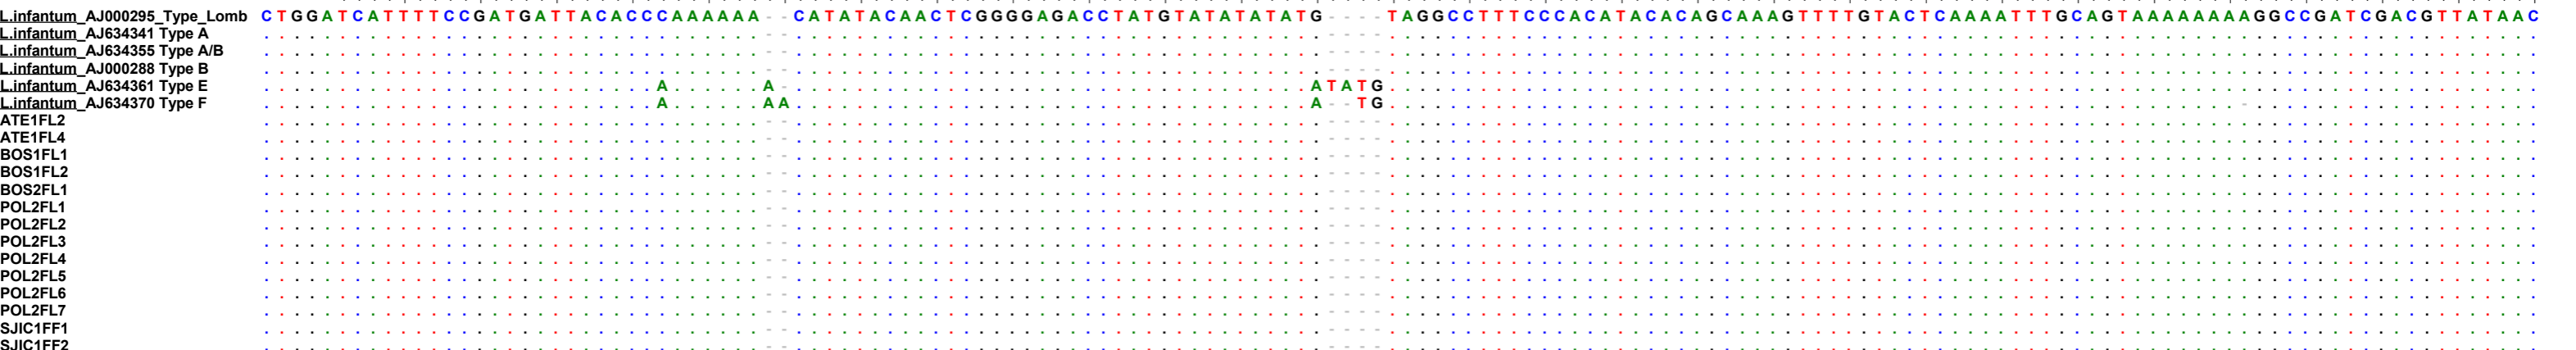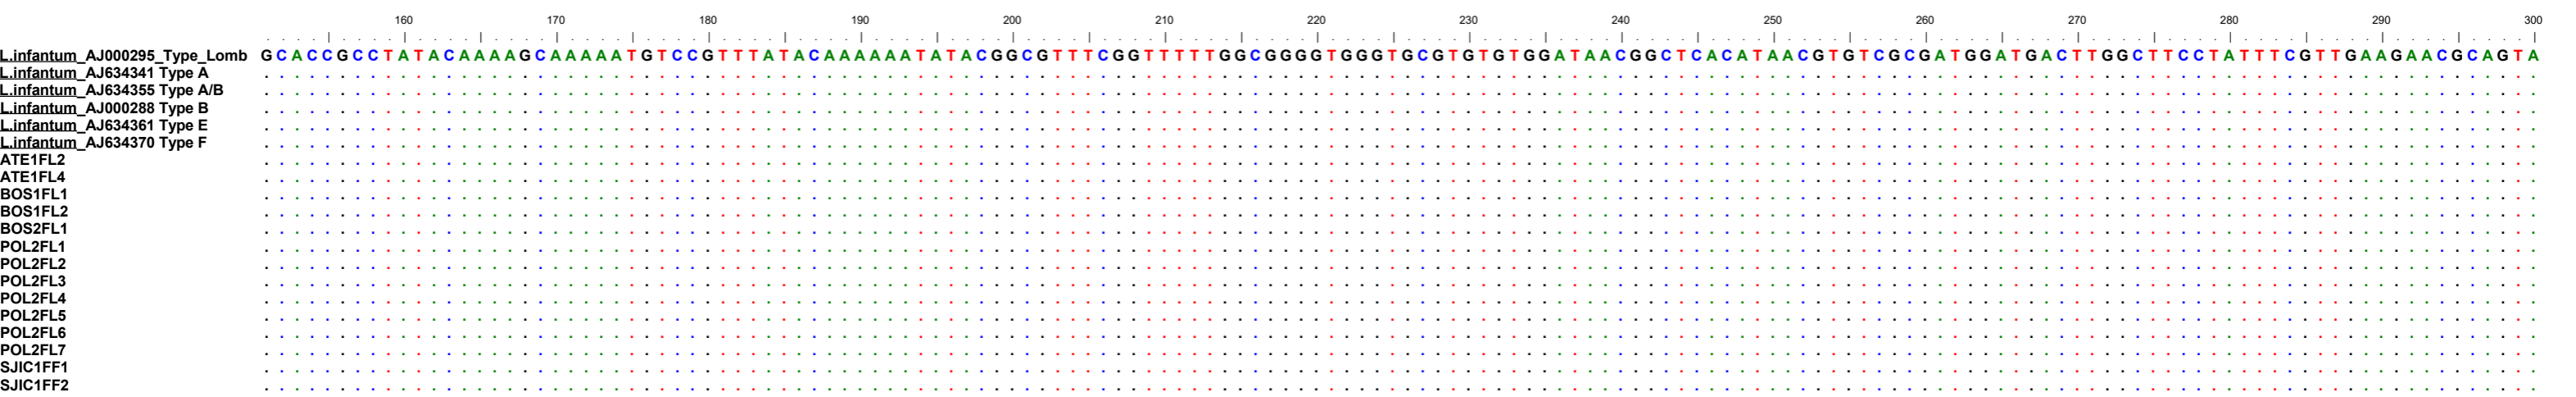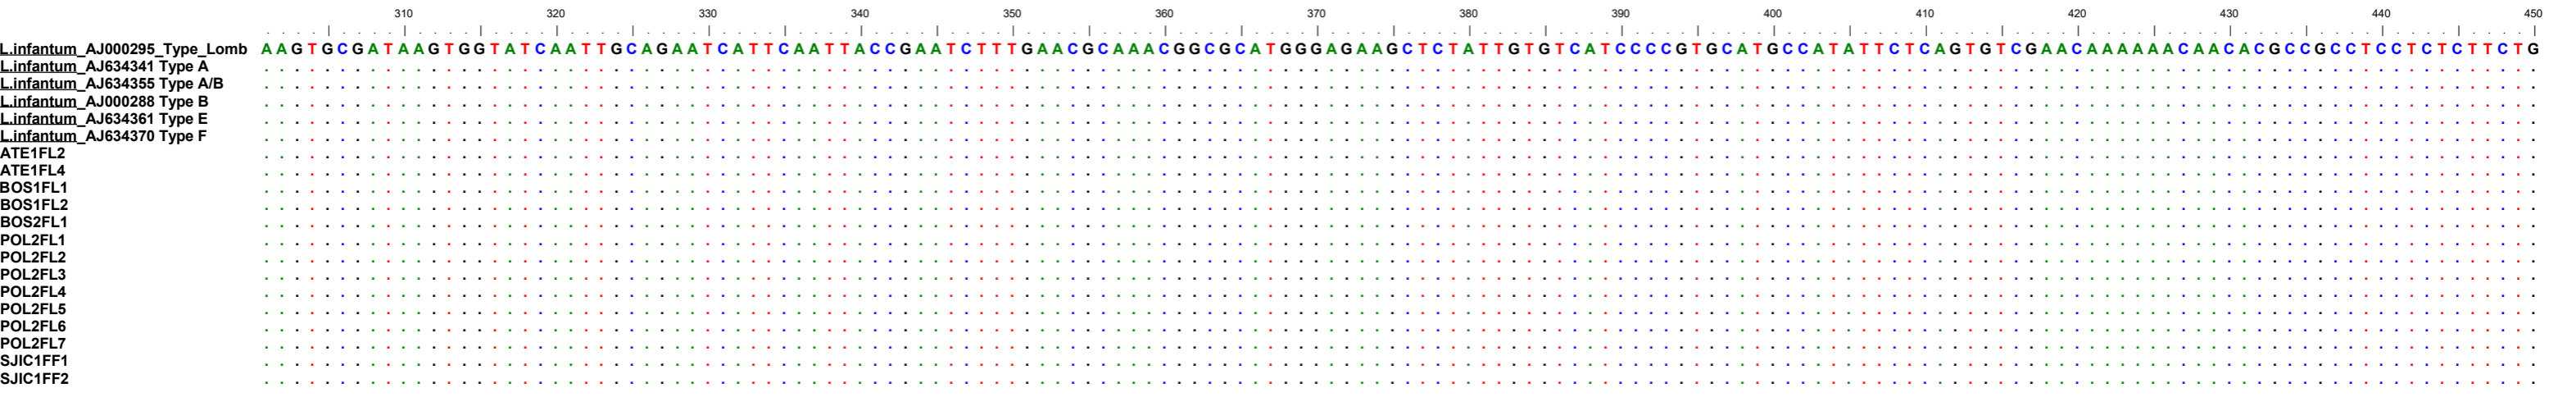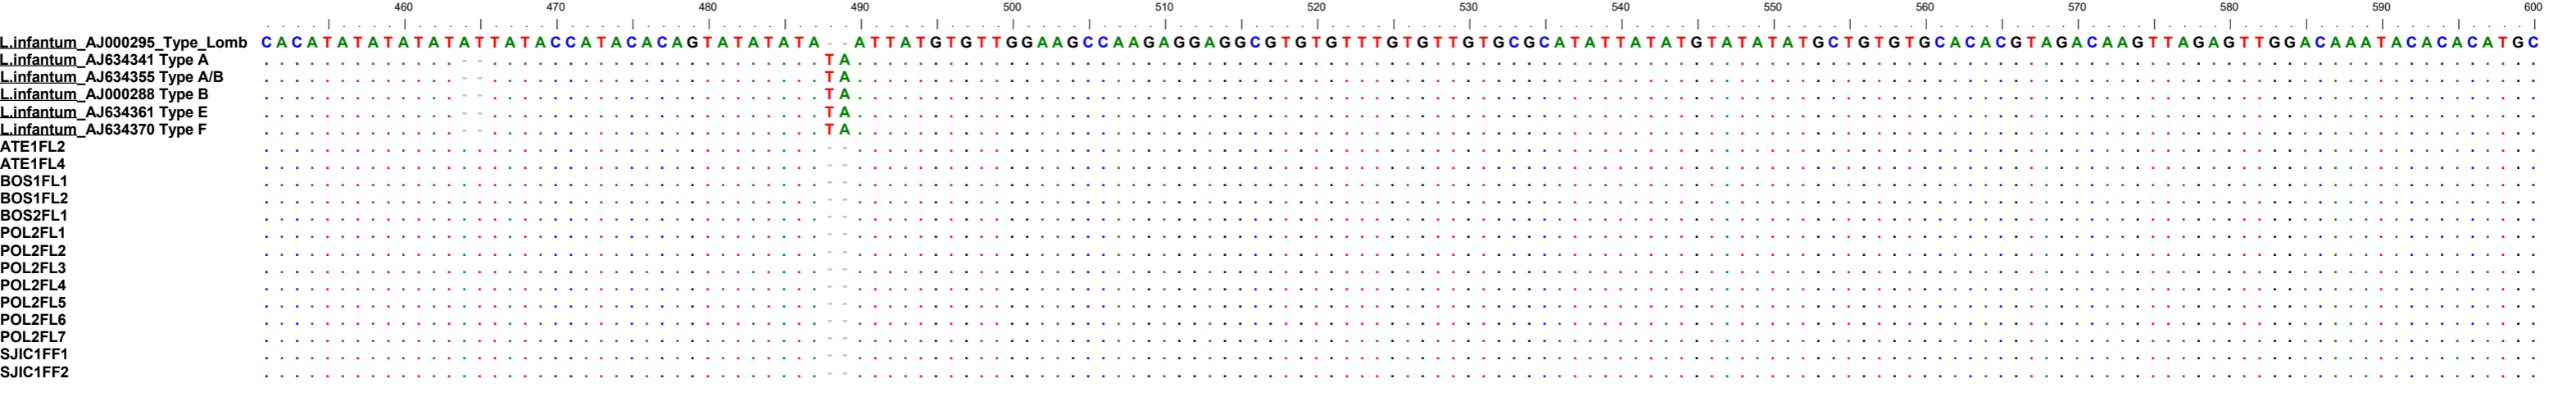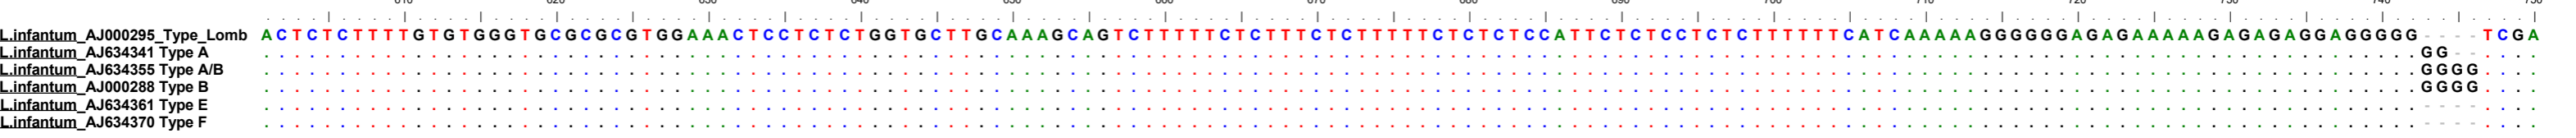

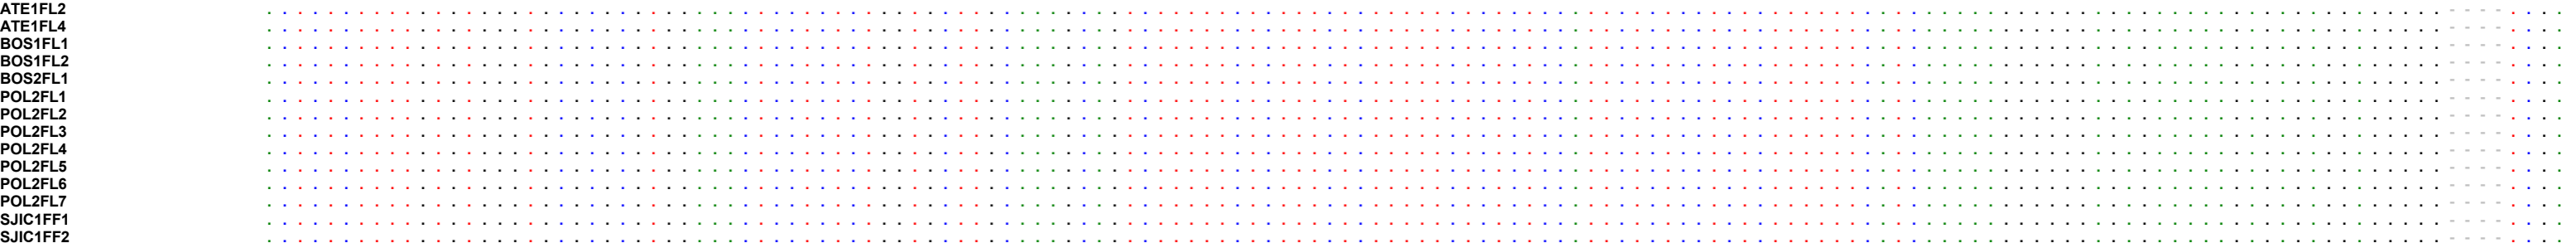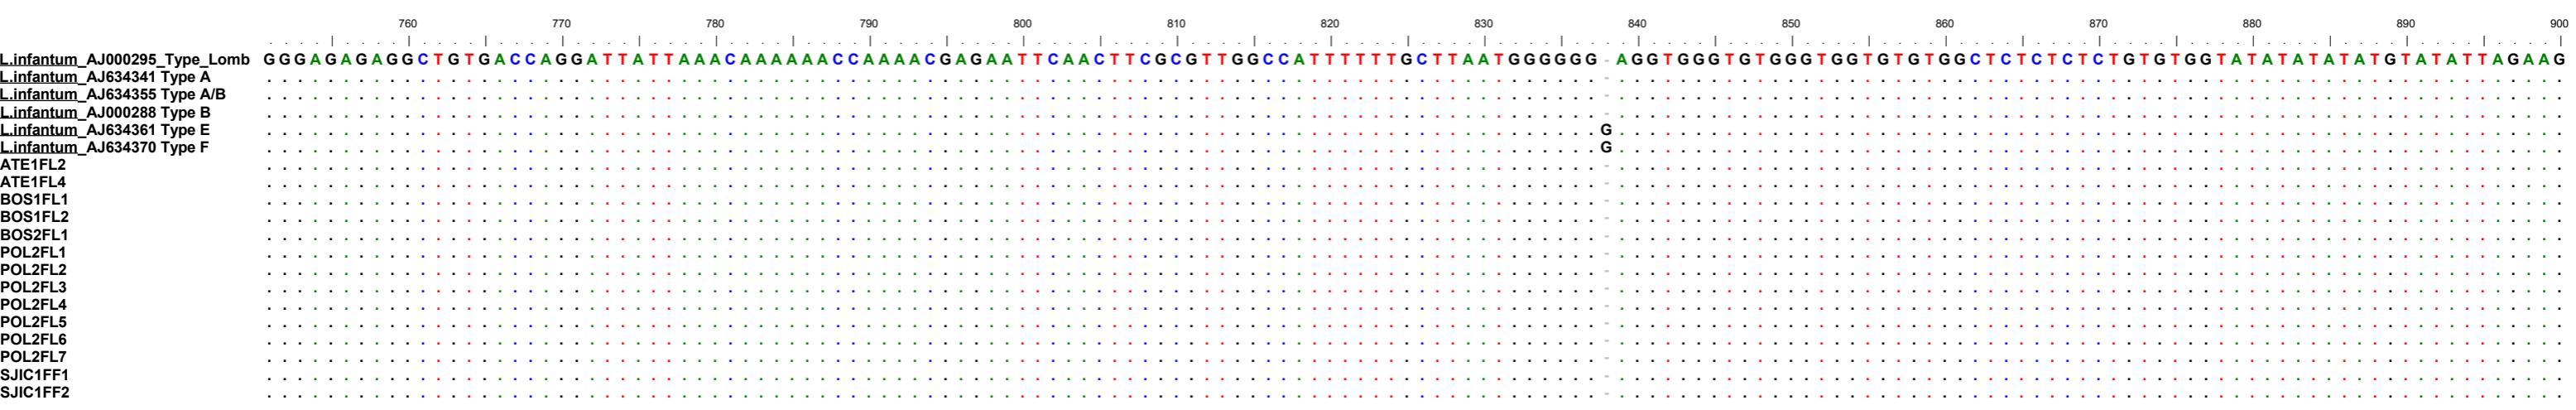

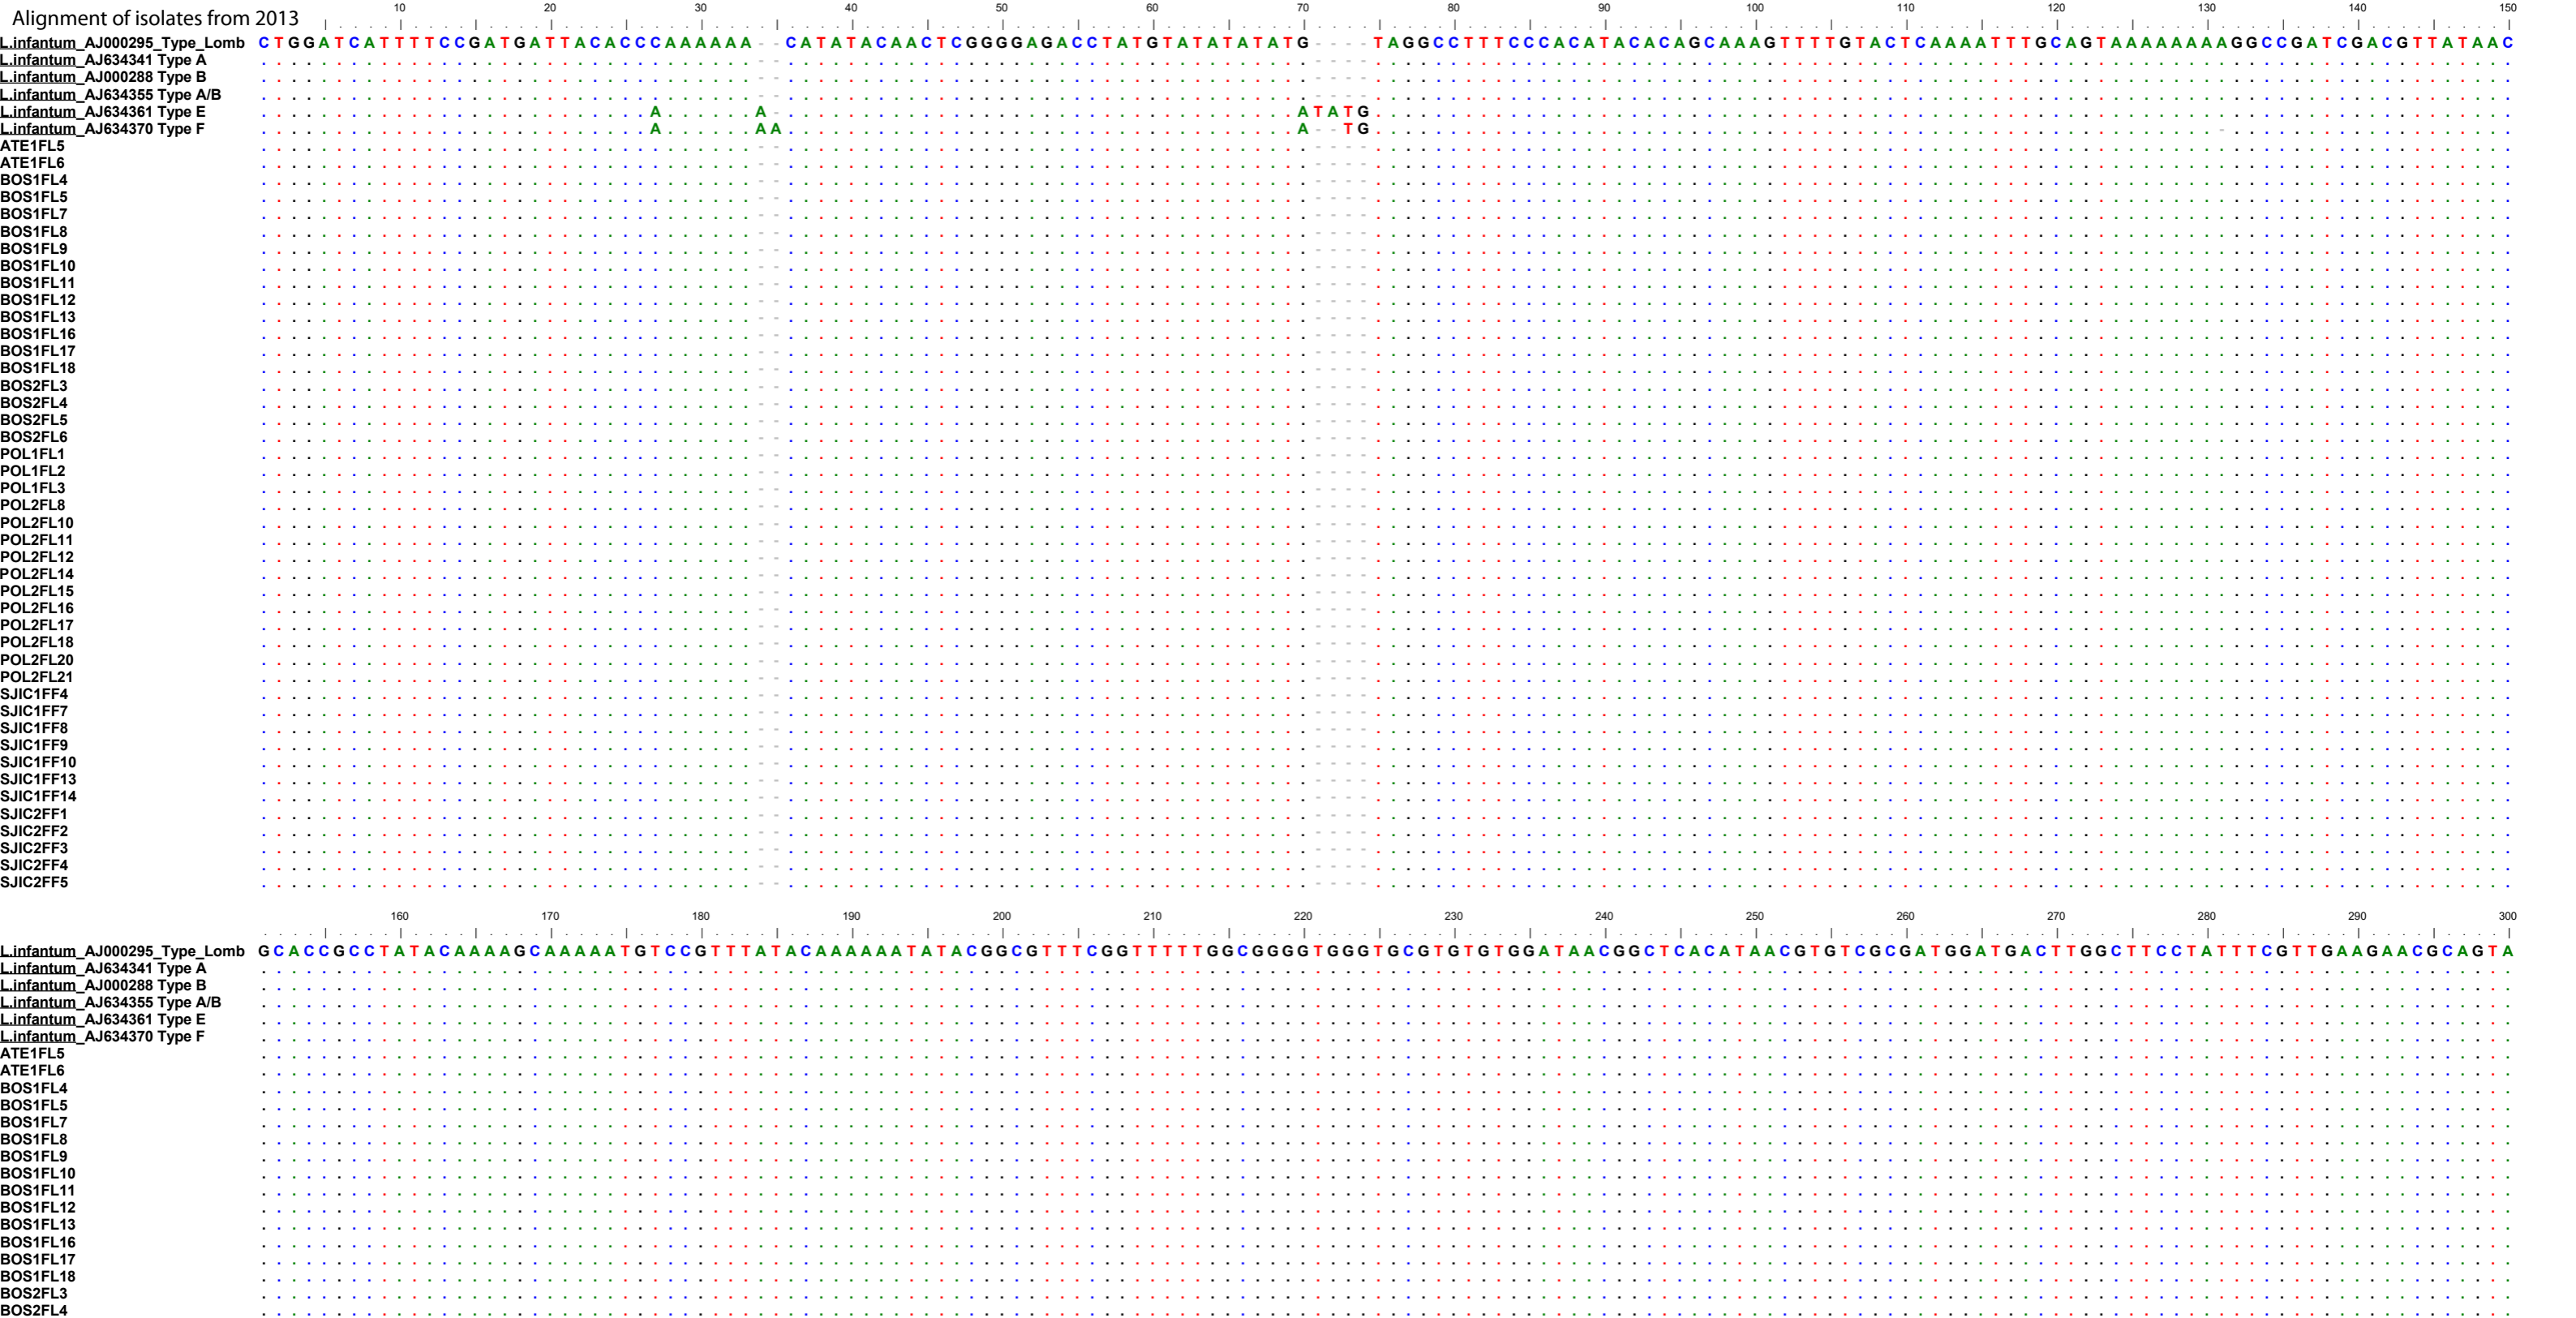

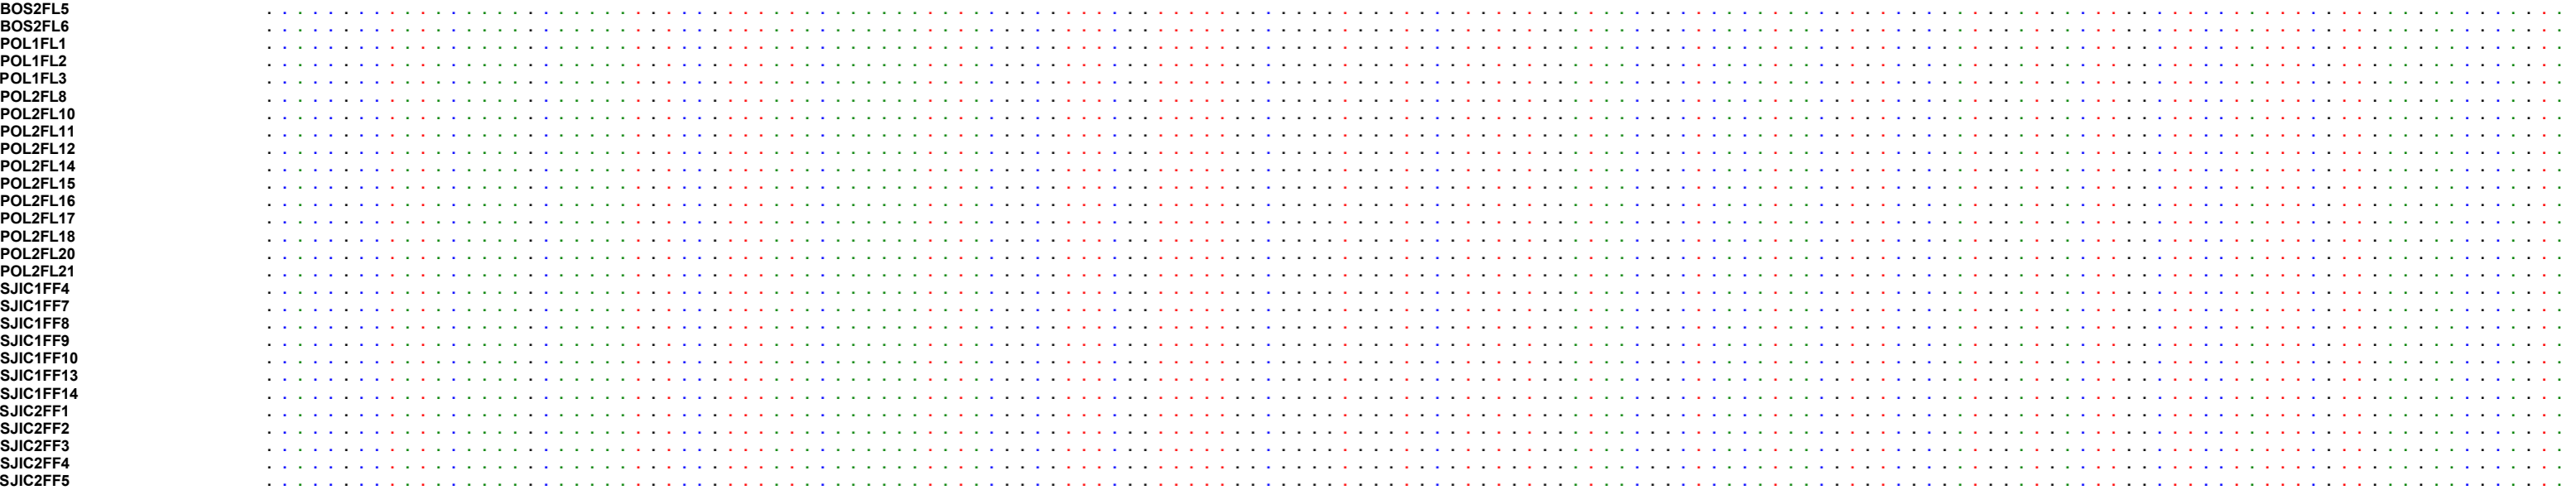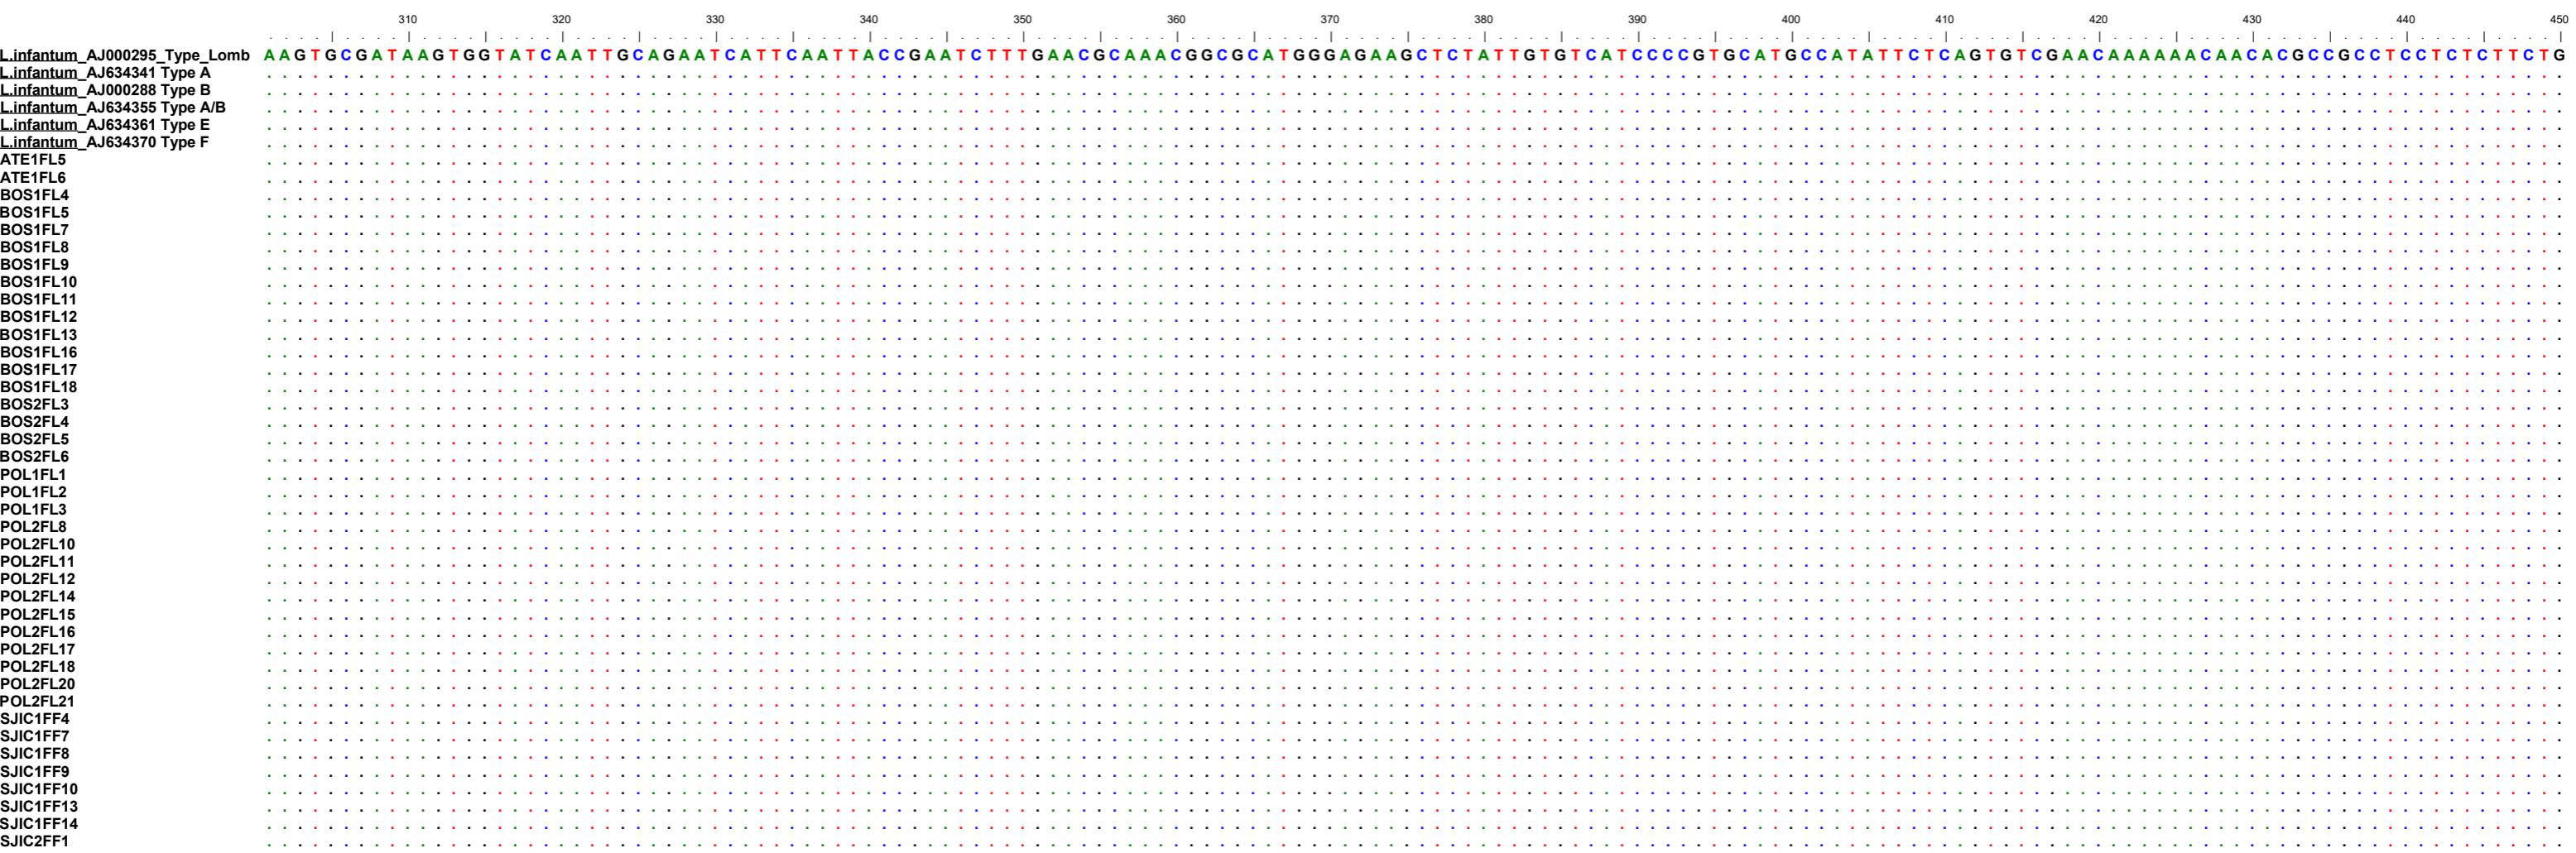

SJIC2FF2  
SJIC2FF3  
SJIC2FF4  
SJIC2FF5

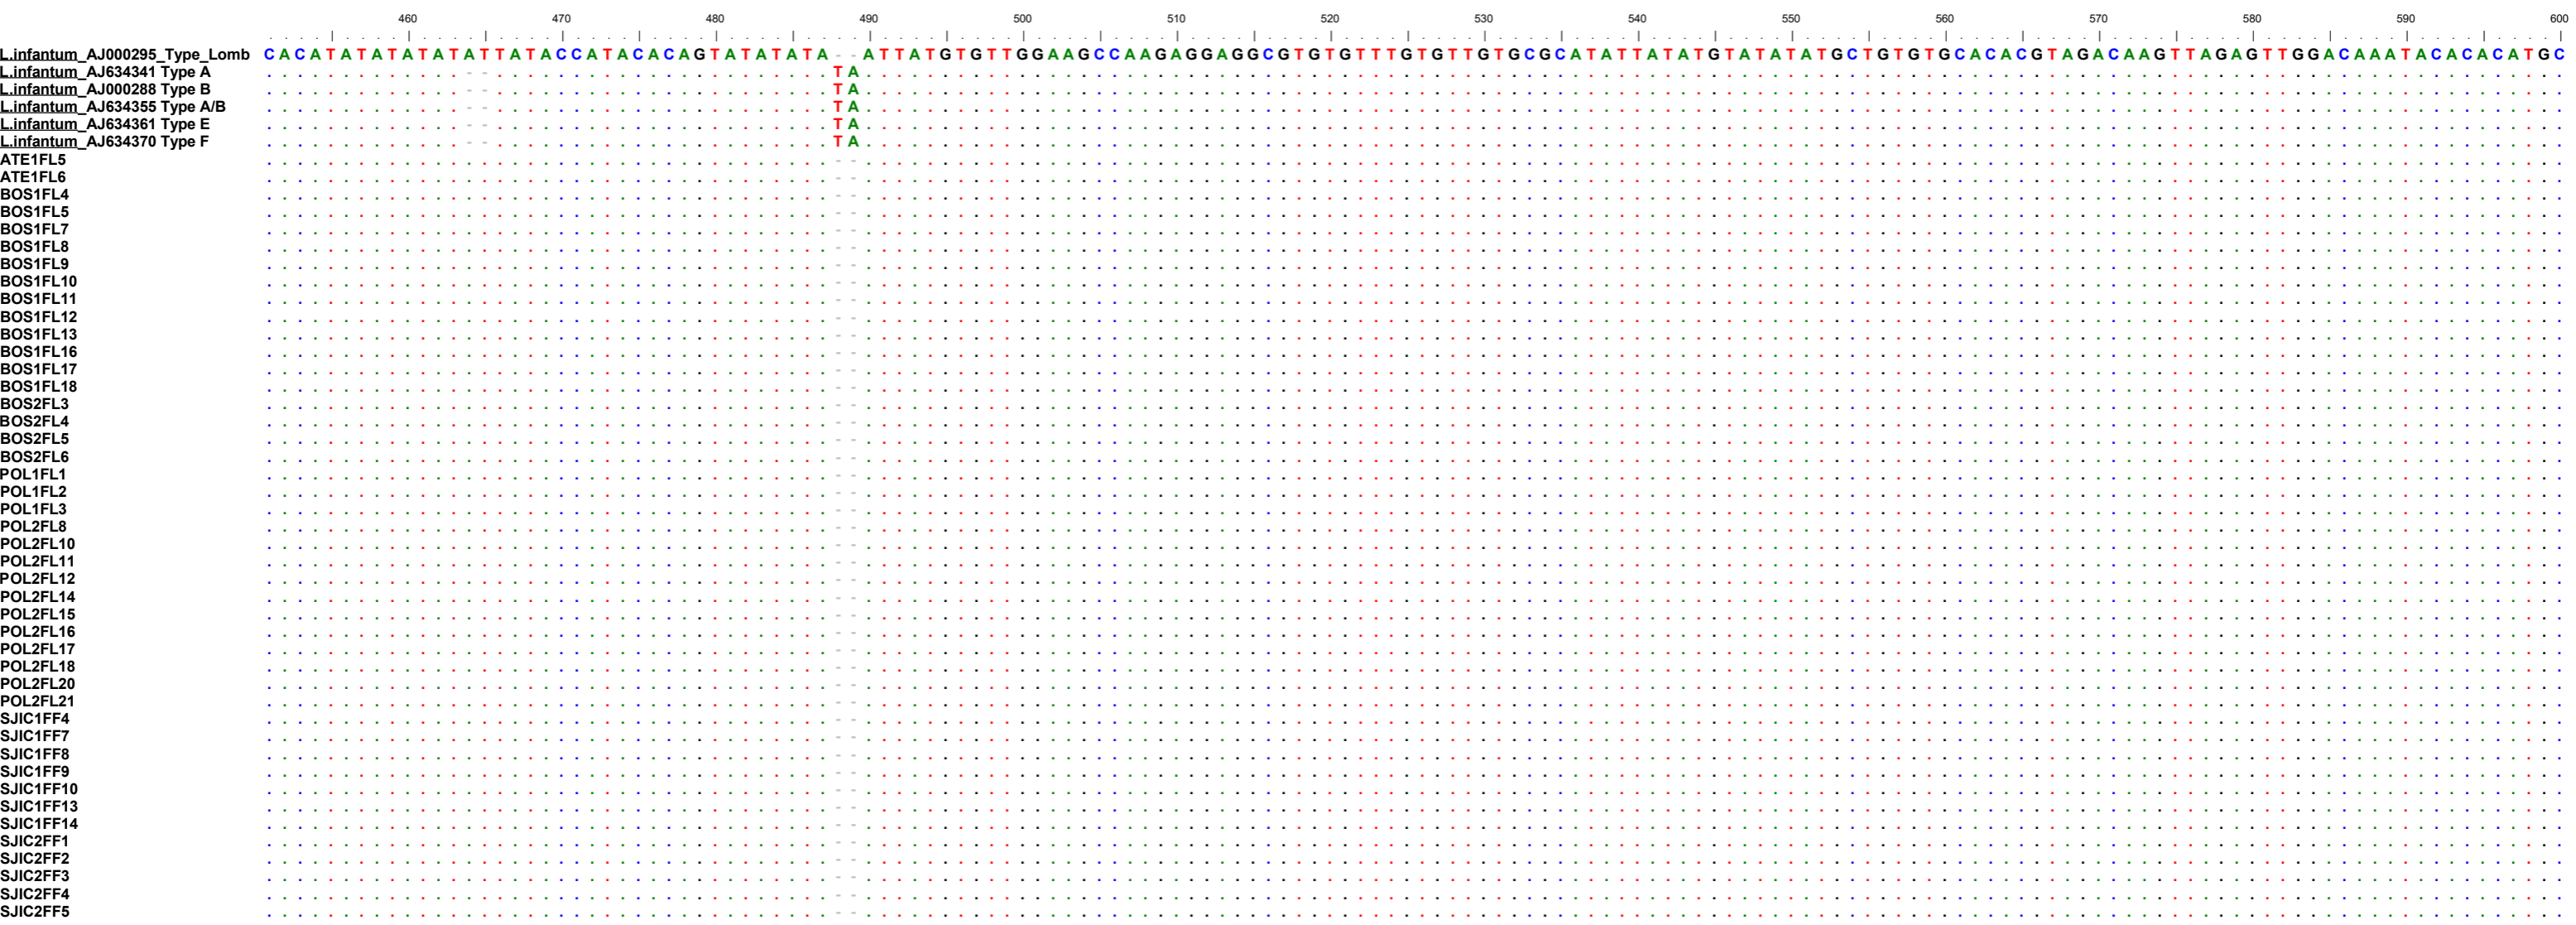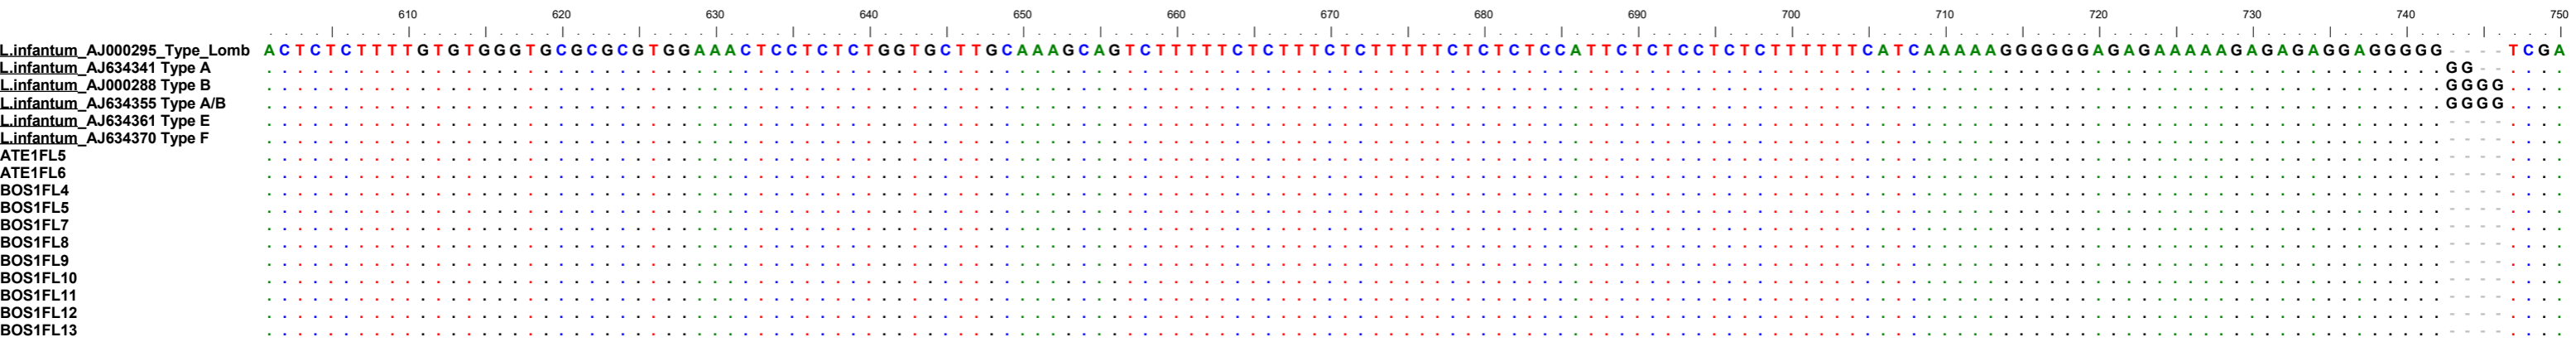

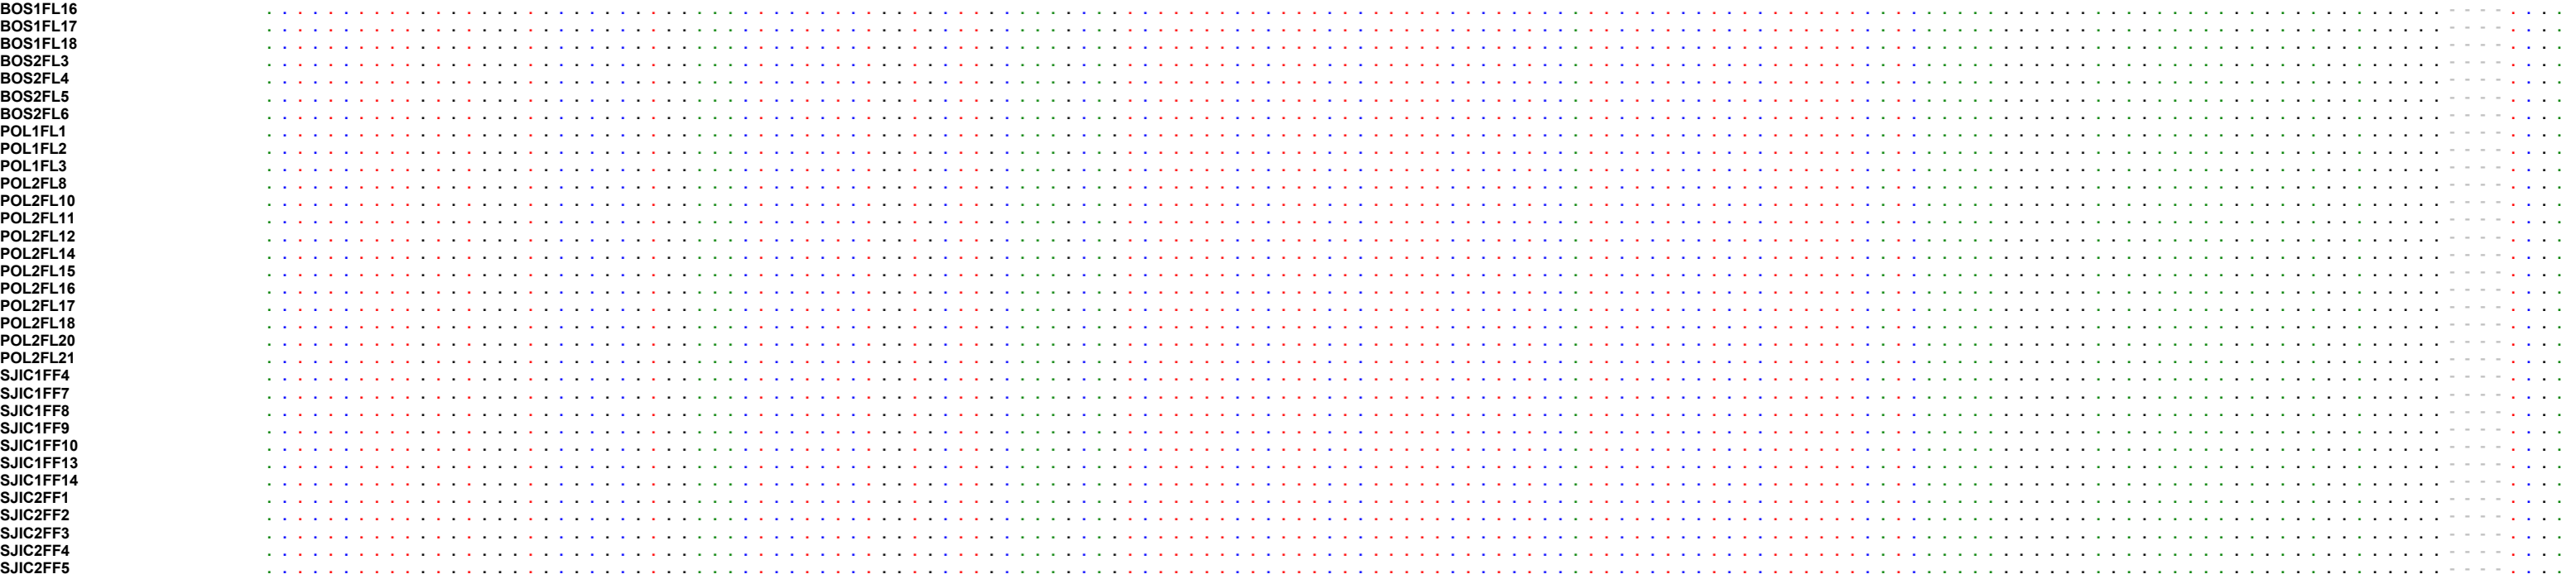

760 770 780 790 800 810 820 830 840 850 860 870 880 890 900

*L. infantum*\_AJ000295\_Type\_Lomb GGGAGAGAGGCTGTGACCAGGATTTATTAAACAAAAACCAAAACGAGAAATCAACTTCGCGTTGGCCA TTTTTTGCTTAATGGGGGG AGGTGGGTGTGGGTGGTGTGTGGCTCTCTCTCTGTGTGGTATATATATATGTATATTAGAAG

*L. infantum*\_AJ634341\_Type A

*L. infantum*\_AJ000288\_Type B

*L. infantum*\_AJ634355\_Type A/B

*L. infantum*\_AJ634361\_Type E

*L. infantum*\_AJ634370\_Type F

ATE1FL5

ATE1FL6

BOS1FL4

BOS1FL5

BOS1FL7

BOS1FL8

BOS1FL9

BOS1FL10

BOS1FL11

BOS1FL12

BOS1FL13

BOS1FL16

BOS1FL17

BOS1FL18

BOS2FL3

BOS2FL4

BOS2FL5

BOS2FL6

POL1FL1

POL1FL2

POL1FL3

POL2FL8

POL2FL10

POL2FL11

POL2FL12

POL2FL14

POL2FL15

POL2FL16

POL2FL17

POL2FL18

POL2FL20

POL2FL21

SJIC1FF4

SJIC1FF7

SJIC1FF8

SJIC1FF10  
 SJIC1FF13  
 SJIC1FF14  
 SJIC2FF1  
 SJIC2FF2  
 SJIC2FF3  
 SJIC2FF4  
 SJIC2FF5

910 920 930 940 950 960 970 980 990 1000 1010 1020 1030 1040 1050

L.infantum\_AJ000295\_Type\_Lomb TAGGTTGTGTGTGTGTGTATGTGTTTTACACATATATATATCCGCGCCCTCACTCTCTCATATATAATTTATATGTACGCACAGAGAAAAAAGAGAGGGCGCTCTCTTTTCCCCCACCCCC - GACAACCNNNTGTTTACAGACCTGAGTGT  
 L.infantum\_AJ634341 Type A  
 L.infantum\_AJ000288 Type B  
 L.infantum\_AJ634355 Type A/B  
 L.infantum\_AJ634361 Type E C  
 L.infantum\_AJ634370 Type F C  
 ATE1FL5  
 ATE1FL6  
 BOS1FL4  
 BOS1FL5  
 BOS1FL7  
 BOS1FL8  
 BOS1FL9  
 BOS1FL10  
 BOS1FL11  
 BOS1FL12  
 BOS1FL13  
 BOS1FL16  
 BOS1FL17  
 BOS1FL18  
 BOS2FL3  
 BOS2FL4  
 BOS2FL5  
 BOS2FL6  
 POL1FL1  
 POL1FL2  
 POL1FL3  
 POL2FL8  
 POL2FL10  
 POL2FL11  
 POL2FL12  
 POL2FL14  
 POL2FL15  
 POL2FL16  
 POL2FL17  
 POL2FL18  
 POL2FL20  
 POL2FL21  
 SJIC1FF4  
 SJIC1FF7  
 SJIC1FF8  
 SJIC1FF9  
 SJIC1FF10  
 SJIC1FF13  
 SJIC1FF14  
 SJIC2FF1  
 SJIC2FF2  
 SJIC2FF3  
 SJIC2FF4  
 SJIC2FF5

Alignment of isolates from 2014

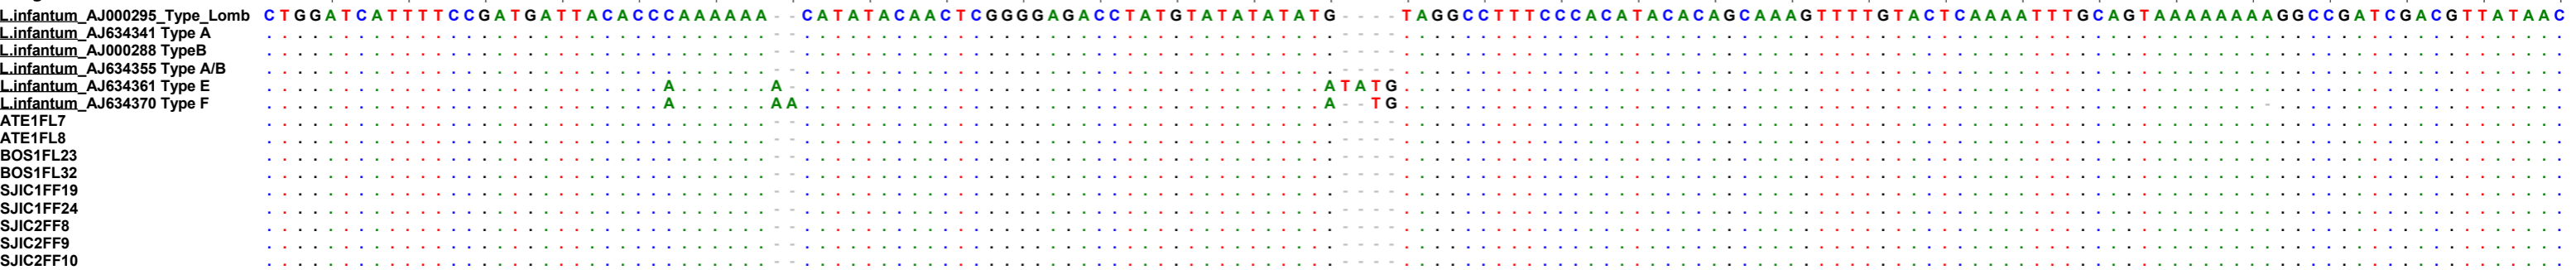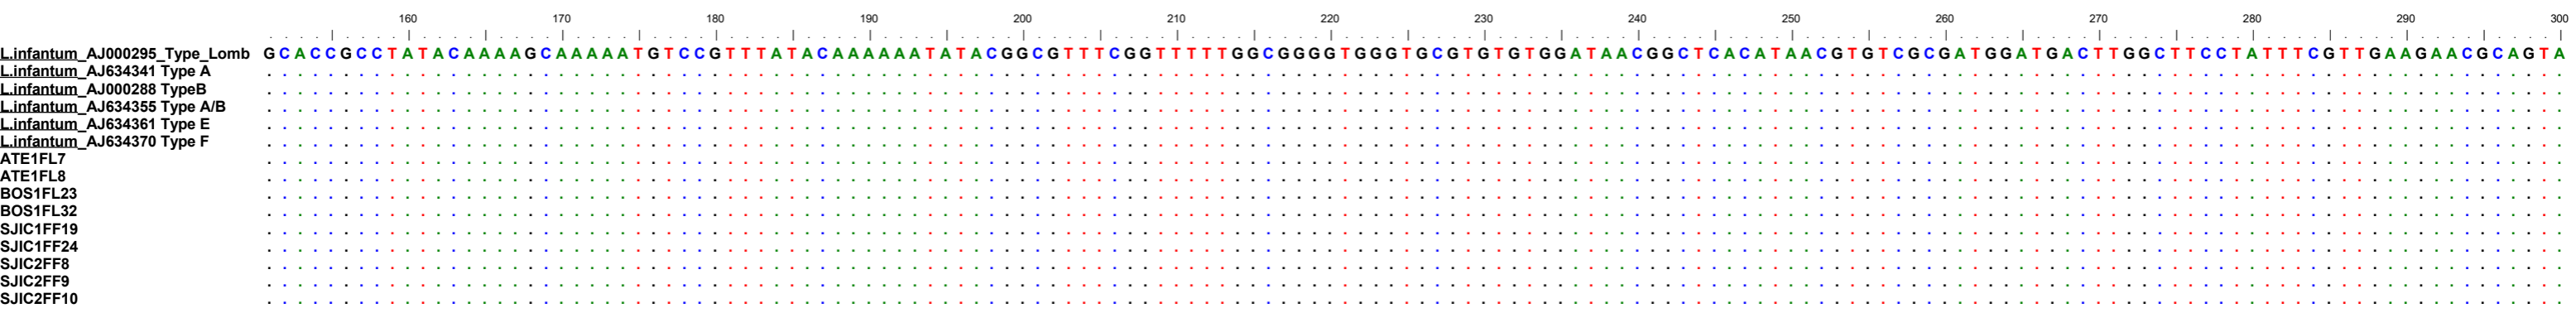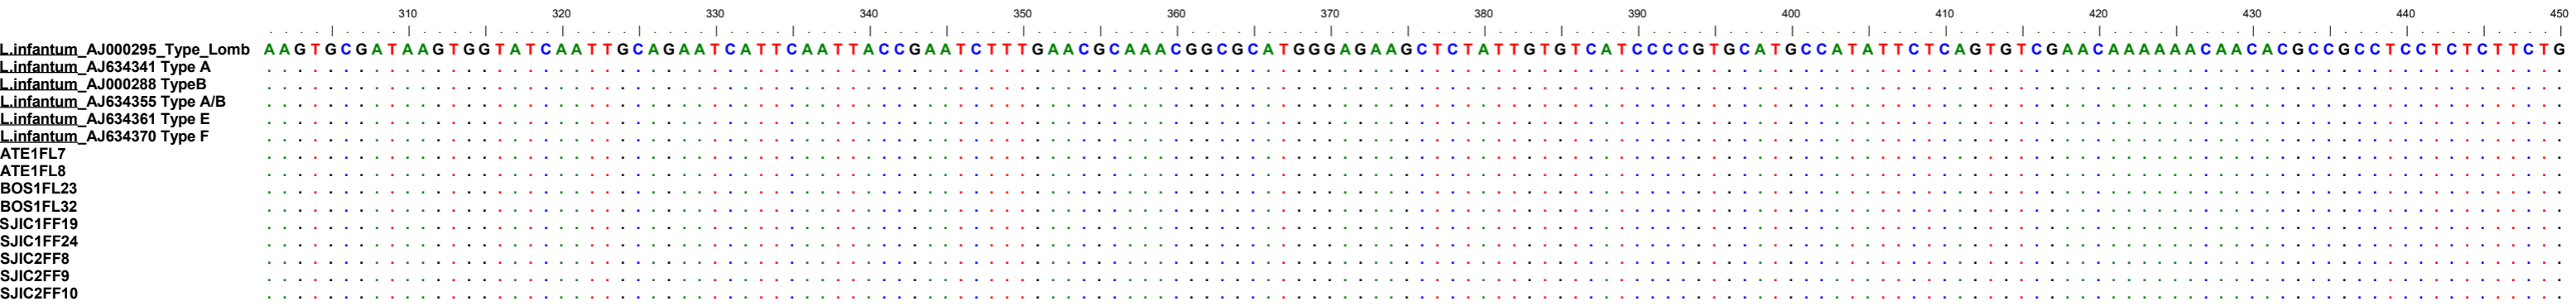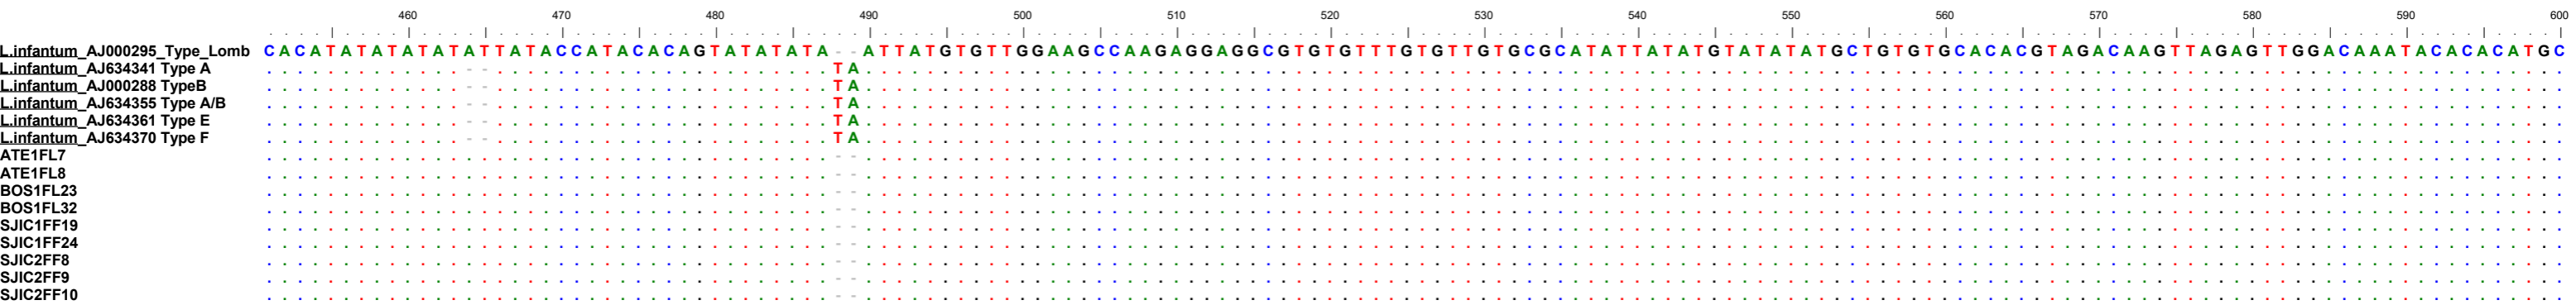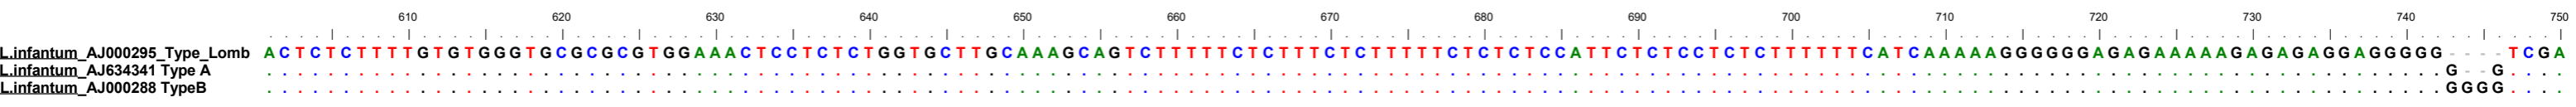



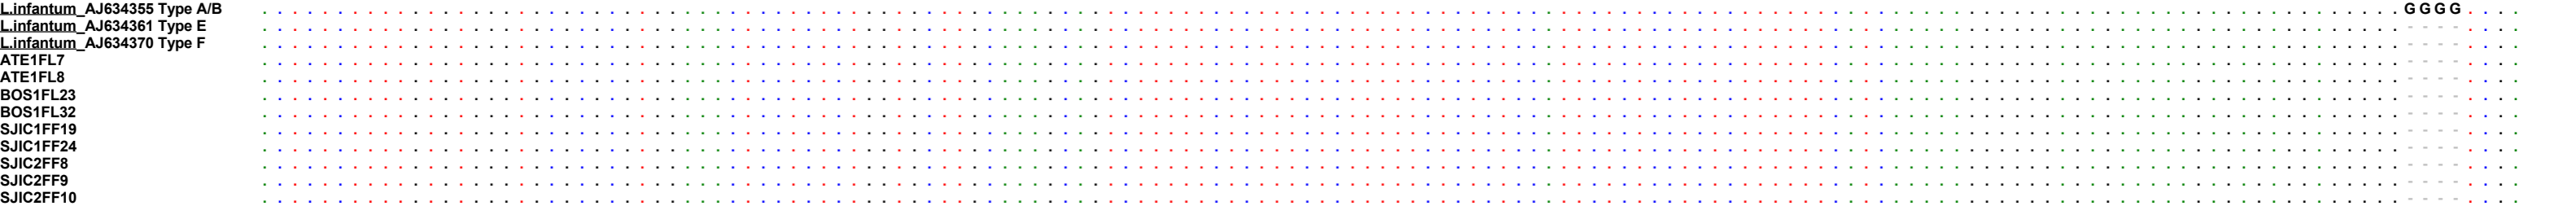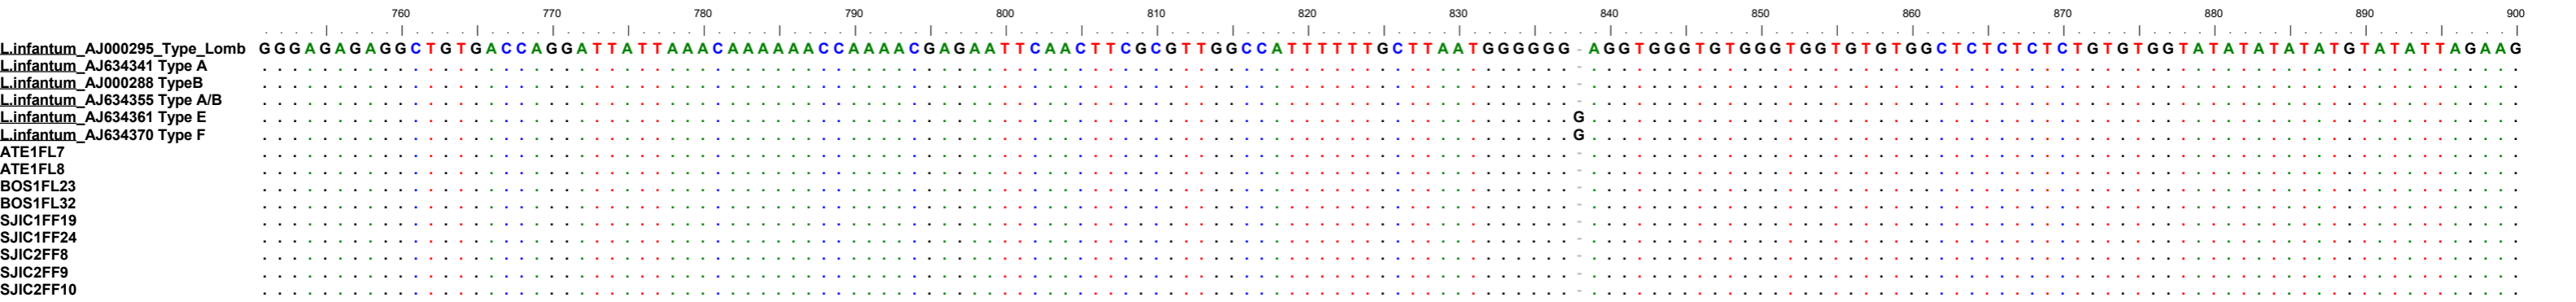

Supplement: MOESM5 [file 13071_2017_2309_MOESM5_ESM.pdf]
